# Supplementary material for: Interface between breast cancer cells and the tumor microenvironment using platelet-rich plasma to promote tumor angiogenesis - influence of platelets and fibrin bundles on the behavior of breast tumor cells
Source: PubMed Central journal article supplement (PMC5370006; doi:10.18632/oncotarget.15170), 2017-02-09
Supplement: oncotarget-08-16851-s001.pdf [file oncotarget-08-16851-s001.pdf]

# Interface between breast cancer cells and the tumor microenvironment using platelet-rich plasma to promote tumor angiogenesis - influence of platelets and fibrin bundles on the behavior of breast tumor cells

## Supplementary Materials

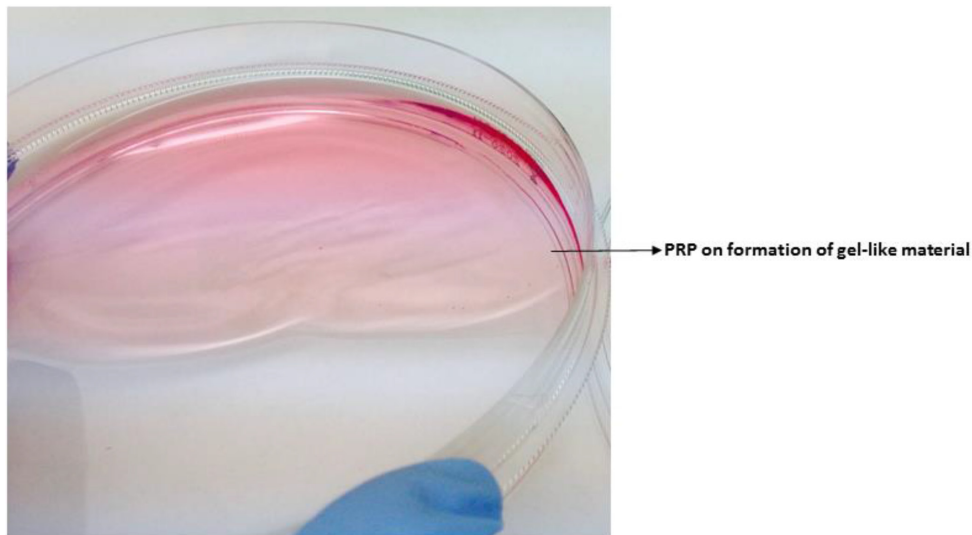

**Supplementary Figure 1: Effects of PRP on formation of gel-like material in epithelial and stromal cell cultures.** Cells were seeded, conditioning of epithelial and fibroblast cells began by using PRP replacing FBS. In this case, 5% FBS and 5% PRP. PPP (platelet-poor plasma) was used as negative control. These conditions allowed the network of fibrin bundles to be formed in cell culture as a solid substrate and allowed the transition of cells from focal contacts in the plastic surface to the fibrin bundle over the cultured cells.

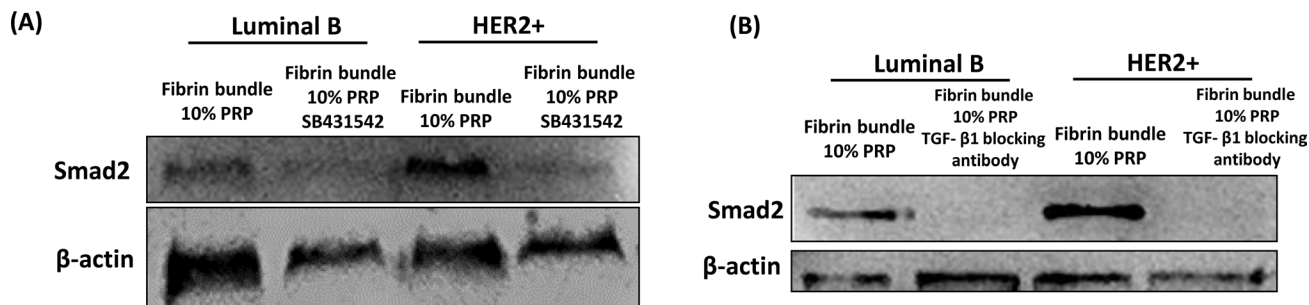

**Supplementary Figure 2: Inhibition and blocking of the TGF-β Pathway in luminal B and HER2+ breast tumor cells.** Detection Smad2 protein levels by immunoblotting of breast tumor cells treated with (A) TGFβRI inhibitor (SB431542) or a (B) TGFβ1 blocking antibody. β-actin is used as loading control.

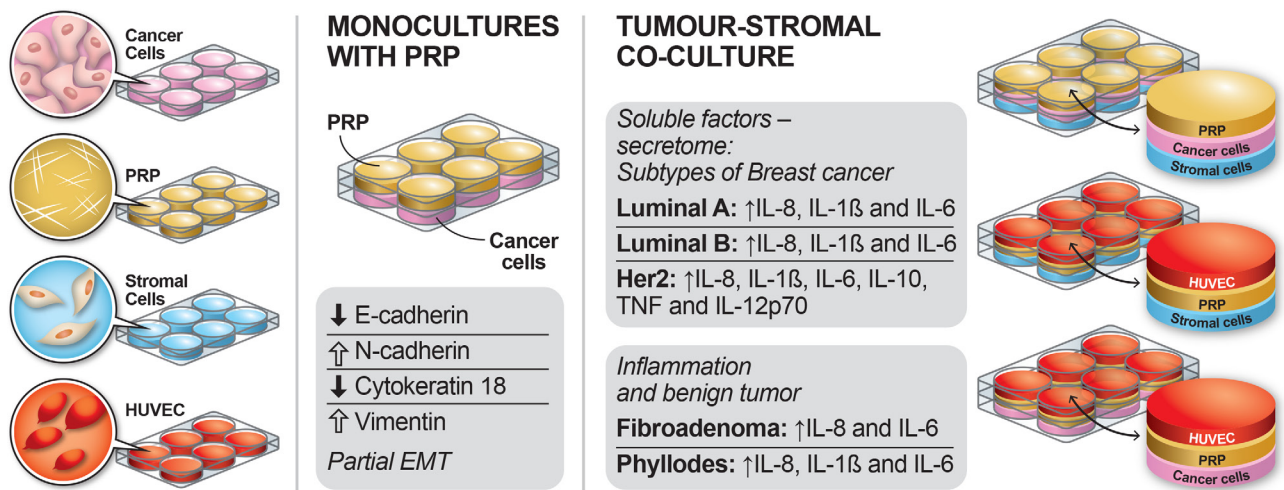

Supplementary Figure 3: Schematic drawing of the experimental procedure and results obtained with PRP.
